# Supplementary material
Source: publisher figshare collection journal article supplement (https://sage.figshare.com/ndownloader/files/13900724)
Supplement: Supplementary file 1 [file 13900724]

## Supplementary Material

### The Context Sensitivity Index (CSI)

Read the following short descriptions of situations that may arise in your everyday life. For each situation, first spend a few moments to try to imagine that you are actually in the situation, and then answer the questions that follow by circling the number that best corresponds with your response.

#### 1. A friend calls and asks you to do a favor for their partner, whom you don't like.

|                                                                              | Not at all |   |   |   | Very much |   |   |
|------------------------------------------------------------------------------|------------|---|---|---|-----------|---|---|
| a. How much control do you have over what happens next?                      | 1          | 2 | 3 | 4 | 5         | 6 | 7 |
| b. How much control do <u>others</u> have over what happens next?            | 1          | 2 | 3 | 4 | 5         | 6 | 7 |
| c. How much cooperation do you need from others to respond to this situation | 1          | 2 | 3 | 4 | 5         | 6 | 7 |
| d. How threatening is this situation?                                        | 1          | 2 | 3 | 4 | 5         | 6 | 7 |

#### 2. Your partner is at risk for diabetes and has been told by his/her doctor to go on a diet. He/she is refusing.

|                                                                              | Not at all |   |   |   | Very much |   |   |
|------------------------------------------------------------------------------|------------|---|---|---|-----------|---|---|
| a. How much control do you have over what happens next?                      | 1          | 2 | 3 | 4 | 5         | 6 | 7 |
| b. How much control do <u>others</u> have over what happens next?            | 1          | 2 | 3 | 4 | 5         | 6 | 7 |
| c. How much cooperation do you need from others to respond to this situation | 1          | 2 | 3 | 4 | 5         | 6 | 7 |
| d. How threatening is this situation?                                        | 1          | 2 | 3 | 4 | 5         | 6 | 7 |

#### 3. You are walking down a street when you see a person slip and fall. They hit their head when they land.

|                                                                              | Not at all |   |   |   | Very much |   |   |
|------------------------------------------------------------------------------|------------|---|---|---|-----------|---|---|
| a. How much control do you have over what happens next?                      | 1          | 2 | 3 | 4 | 5         | 6 | 7 |
| b. How urgently do you need to respond in this situation?                    | 1          | 2 | 3 | 4 | 5         | 6 | 7 |
| c. How much cooperation do you need from others to respond to this situation | 1          | 2 | 3 | 4 | 5         | 6 | 7 |

#### 4. You take a medicine and it makes you nauseous. Your doctor tells you that it is not serious and that you just have to "wait it out".

|                                                                              | Not at all |   |   |   | Very much |   |   |
|------------------------------------------------------------------------------|------------|---|---|---|-----------|---|---|
| a. How much control do <u>others</u> have over what happens next?            | 1          | 2 | 3 | 4 | 5         | 6 | 7 |
| b. How urgently do you need to respond in this situation?                    | 1          | 2 | 3 | 4 | 5         | 6 | 7 |
| c. How much cooperation do you need from others to respond to this situation | 1          | 2 | 3 | 4 | 5         | 6 | 7 |

**5. You are reading a book while you wait for a flight. When the plane begins to take off you realize you have left the book in the waiting area.**

|                                                           | Not at all |   |   |   | Very much |   |   |
|-----------------------------------------------------------|------------|---|---|---|-----------|---|---|
| a. How much control do you have over what happens next?   | 1          | 2 | 3 | 4 | 5         | 6 | 7 |
| b. How urgently do you need to respond in this situation? | 1          | 2 | 3 | 4 | 5         | 6 | 7 |
| c. How threatening is this situation?                     | 1          | 2 | 3 | 4 | 5         | 6 | 7 |

**6. You see somebody on a street suddenly punch another person. They turn to you angrily saying “What are you looking at?”**

|                                                                   | Not at all |   |   |   | Very much |   |   |
|-------------------------------------------------------------------|------------|---|---|---|-----------|---|---|
| a. How much control do <u>others</u> have over what happens next? | 1          | 2 | 3 | 4 | 5         | 6 | 7 |
| b. How urgently do you need to respond in this situation?         | 1          | 2 | 3 | 4 | 5         | 6 | 7 |
| e. How threatening is this situation?                             | 1          | 2 | 3 | 4 | 5         | 6 | 7 |

### Scoring

Each appraisal dimension is scored following the key below. Reverse coded items are indicated by capital “R” such that a response of 1 is scored as 7, a response of 2 is scored as 6, etc. Cue Presence scores, which represent sensitivity to the presence of cues, are created by totaling the non-reversed items while Cue Absence scores, which represent sensitivity to the relative absence of cues, are created by totaling the reversed items.

Cue Presence (10 items):

$$(1a + 2b + 2c + 2d + 3a + 3b + 3c + 6a + 6b + 6c)$$

Cue Absence (10 items, all reversed coded):

$$(1bR + 1cR + 1dR + 2aR + 4aR + 4bR + 4cR + 5aR + 5bR + 5cR)$$
